# Supplementary material
Source: publisher figshare collection journal article supplement (https://gsajournals.figshare.com/ndownloader/files/25491395)

Figure S2

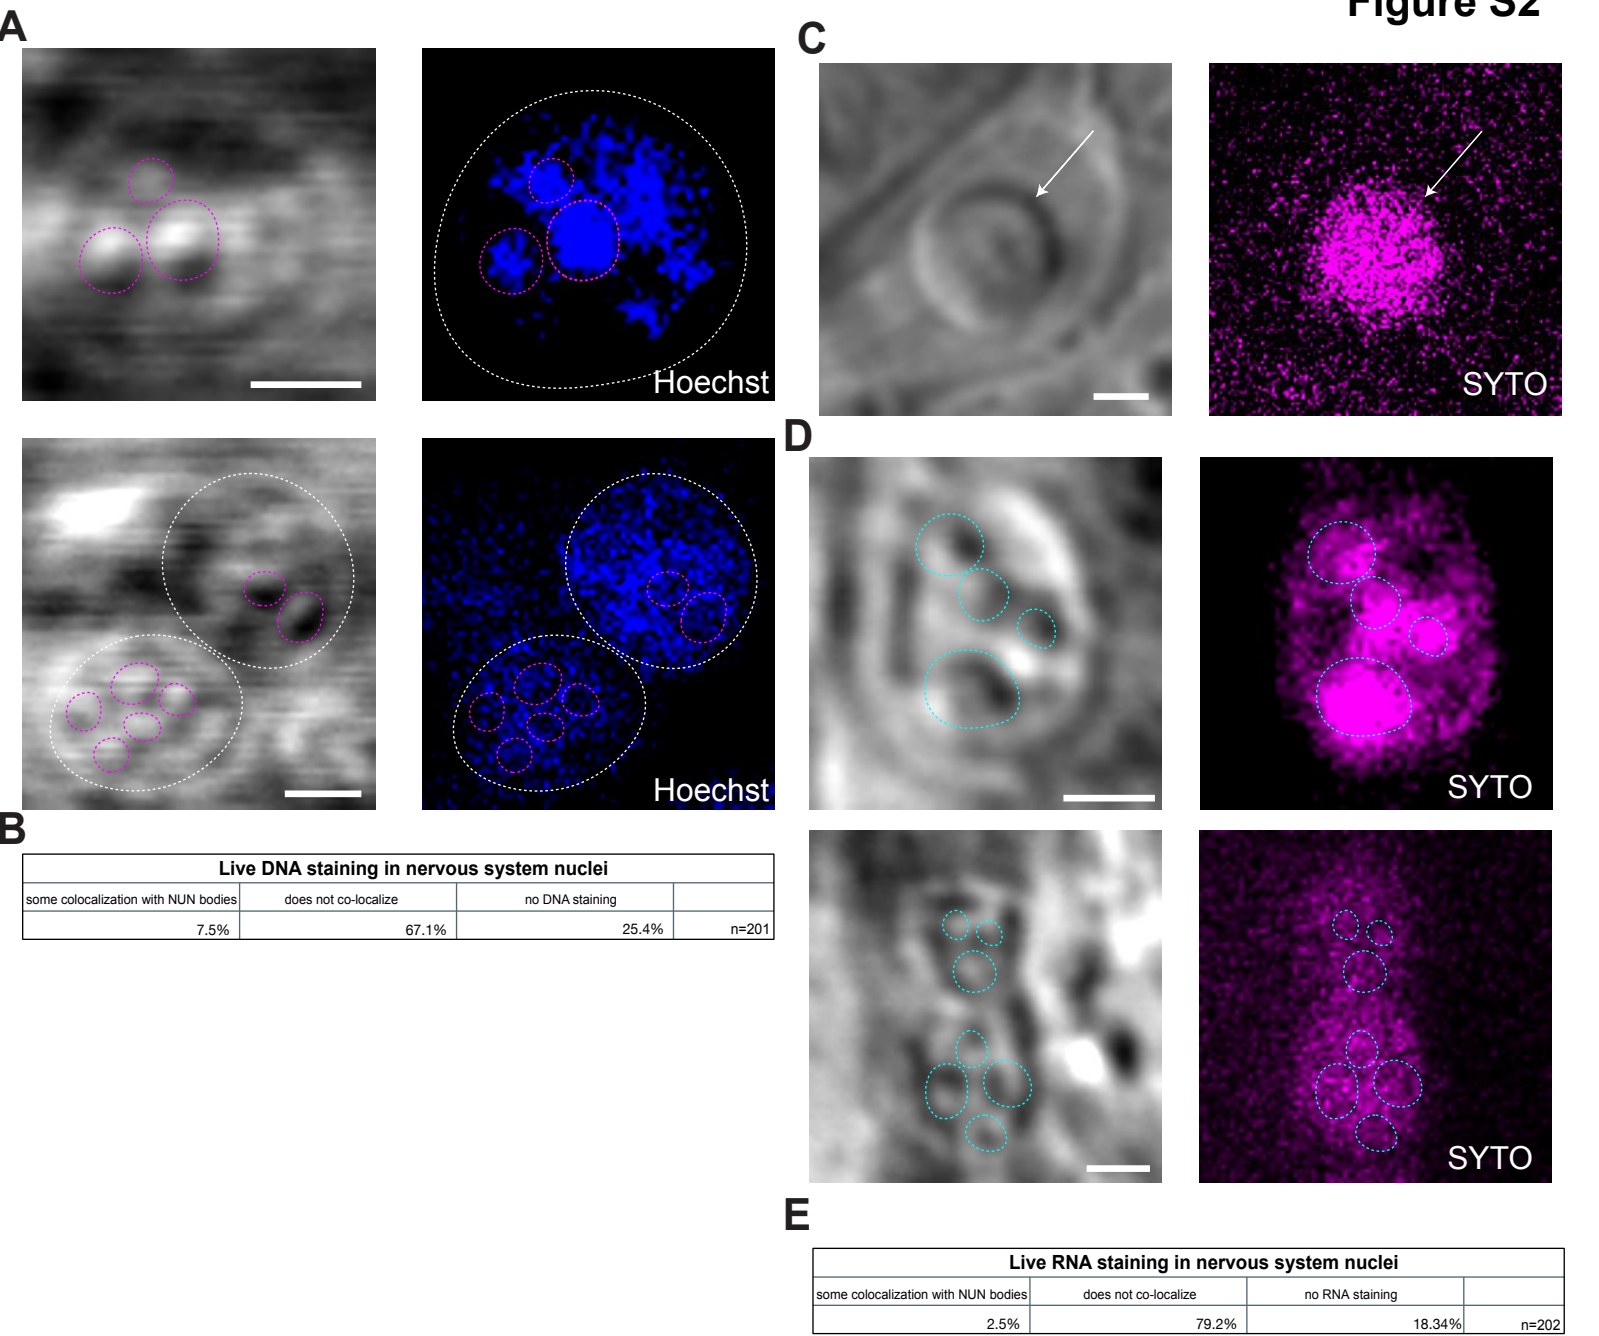

Supplement: Supplementary file 1 [file 25491395]
